# Supplementary material
Source: PubMed Central journal article supplement (PMC545511)
Supplement: pnas_102_3_838__3.pdf [file pnas_102_3_838__3.pdf]

**Table 3. CDSs containing large (>5 bp) tandem repeats in the genome of *Ehrlichia ruminantium***

| Systematic gene id (gene name)   | Length of gene, bp | Length of repeated sequence motif, bp | Frequency of repeat      | Putative product                            |
|----------------------------------|--------------------|---------------------------------------|--------------------------|---------------------------------------------|
| Erum0250                         | 1374               | 99                                    | 8.4                      | unknown                                     |
| Erum0260 ( <i>virD4</i> )        | 2406               | 6                                     | 5                        | type IV secretion system protein VirD4      |
| Erum0280 ( <i>virB10</i> )       | 1347               | 6                                     | 9                        | type IV secretion system protein VirB10     |
| Erum0660                         | 11148              | 300<br>471<br>171<br>171              | 2.6<br>2.7<br>2.4<br>2.4 | unknown                                     |
| Erum1040                         | 3498               | 294                                   | 2.8                      | probable integral membrane protein          |
| Erum1110                         | 1986               | 12<br>27                              | 2.5<br>56.0              | unknown                                     |
| Erum1230                         | 561                | 237                                   | 2.4                      | unknown                                     |
| Erum1430                         | 2856               | 198                                   | 2.3                      | unknown                                     |
| Erum2090 (probable <i>ftsK</i> ) | 2568               | 15                                    | 11.6                     | putative cell division protein FstK         |
| Erum2170                         | 3222               | 126                                   | 5.1                      | unknown                                     |
| Erum2400                         | 1176               | 90                                    | 2                        | probable membrane protein                   |
| Erum2780                         | 1575               | 21                                    | 2                        | probable membrane protein                   |
| Erum3570                         | 1131               | 12                                    | 3.2                      | probable integral membrane protein          |
| Erum3590                         | 1170               | 45<br>42                              | 7.4<br>2.1               | probable integral membrane protein          |
| Erum3600                         | 1758               | 6                                     | 19.3                     | probable integral membrane protein          |
| Erum3730                         | 462                | 27                                    | 2.2                      | unknown                                     |
| Erum3750                         | 5025               | 27<br>144                             | 8.3<br>3.9               | unknown, contains 19 ankyrin repeat domains |
| Erum3980                         | 9009               | 144<br>36<br>93                       | 2.7<br>2.7<br>9.2        | unknown, contains 7 ankyrin repeat domains  |
| Erum4220 ( <i>lysS</i> )         | 1539               | 21                                    | 2                        | lysyl-tRNA synthetase                       |
| Erum4530                         | 600                | 22                                    | 2                        | unknown                                     |
| Erum4740                         | 1920               | 138                                   | 6.9                      | probable exported protein                   |
| Erum4850                         | 1023               | 9                                     | 3                        | conserved hypothetical GTP-binding protein  |

| Systematic gene id (gene name) | Length of gene, bp | Length of repeated sequence motif, bp | Frequency of repeat | Putative product                          |
|--------------------------------|--------------------|---------------------------------------|---------------------|-------------------------------------------|
| Erum5010                       | 1695               | 24                                    | 2.1                 | probable exported protein                 |
| Erum5030 ( <i>petB</i> )       | 1227               | 20                                    | 2                   | cytochrome b                              |
| Erum5210                       | 7368               | 261<br>222<br>180                     | 5.1<br>3.9<br>1.9   | putative type IV secretion system protein |
| Erum5220                       | 4590               | 216<br>15                             | 2.4<br>2.3          | putative type IV secretion system protein |
| Erum5570                       | 1659               | 183                                   | 3                   | unknown                                   |
| Erum7070                       | 4122               | 141<br>198                            | 3.9<br>5.2          | probable membrane protein                 |
| Erum7960                       | 2208               | 15                                    | 2.7                 | unknown, contains a GTP-binding domain    |
| Erum8590                       | 930                | 6                                     | 3.7                 | putative outer membrane protein MAP1-14   |
| Erum8770                       | 534                | 9                                     | 11.6                | unknown                                   |
